# Supplementary material for: Enhanced mid-IR detection characteristics of microplastics and nanoplastics using gold nanorods cluster at microneedle tips
Source: Research Square preprint supplement (doi:10.21203/rs.3.rs-6209048/v1), 2025-04-23
Supplement: Supplementary file 1 [file 40331e08f1ee253ae9d06ac7.docx]

Supporting Information

**Enhanced mid-IR detection characteristics of microplastics and nanoplastics using gold nanorods cluster at microneedle tips**

Hyeyeon Hur1 , Cholong Kim1, Ahyeon Jo1, Gillhwan Kim1 , Jonghoon Choi2, and Hyun Ho Lee1*

1Department of Chemical Engineering, Myongji University

Yongin 17058, Republic of Korea

2School of Integrative Engineering, Chung-Ang University, Seoul 06974, Republic of Korea

**
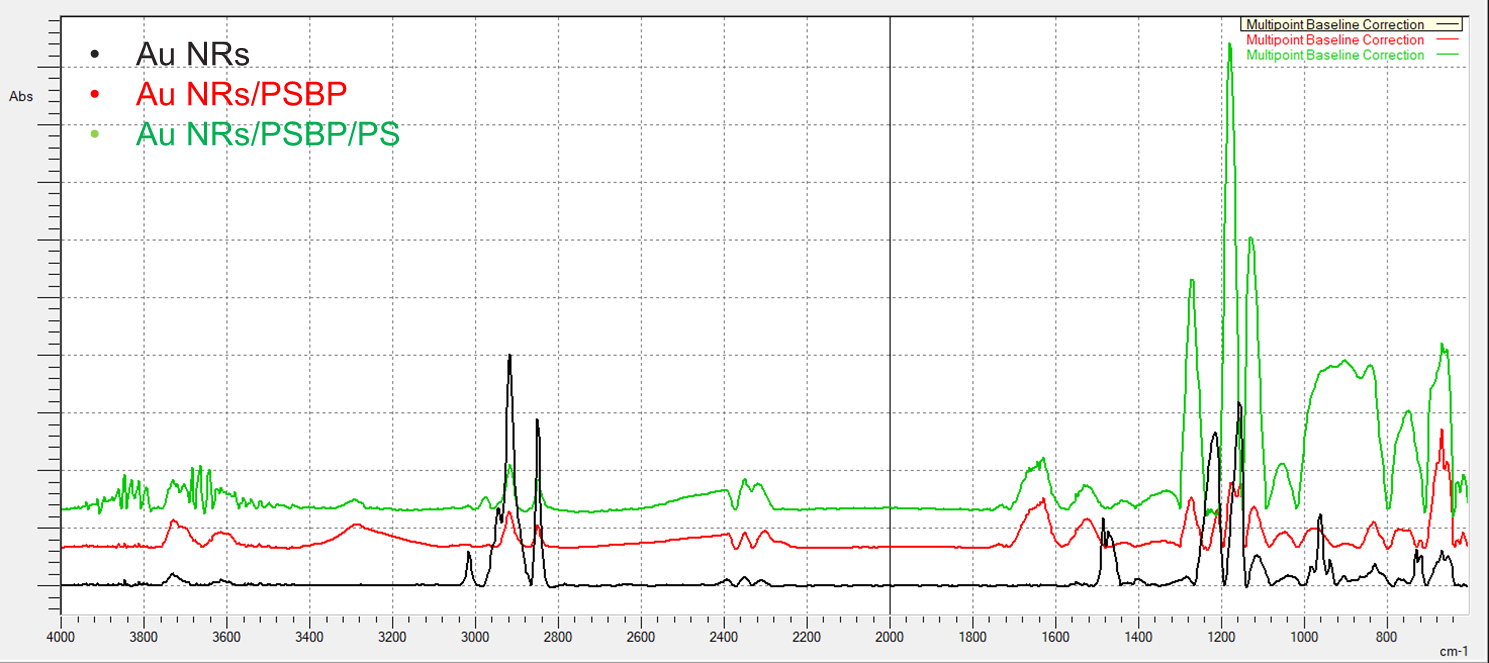
**

**Figure S1.** FTIR spectra for Au NRs’s conjugation of PSBP and after binding of PS MPs on IR detection card (PTFE mesh)

**
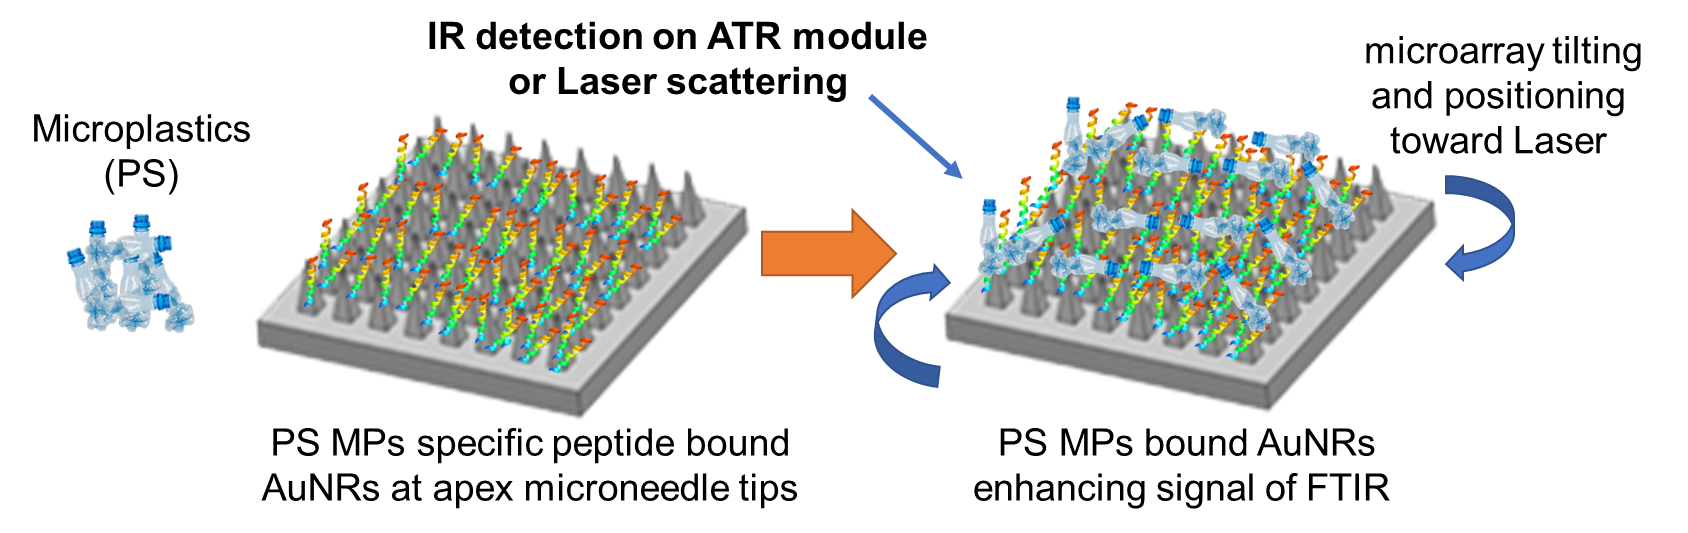
**

**Figure S2.**  Illustration of microneedle array angle tuning for Raman measurement

**
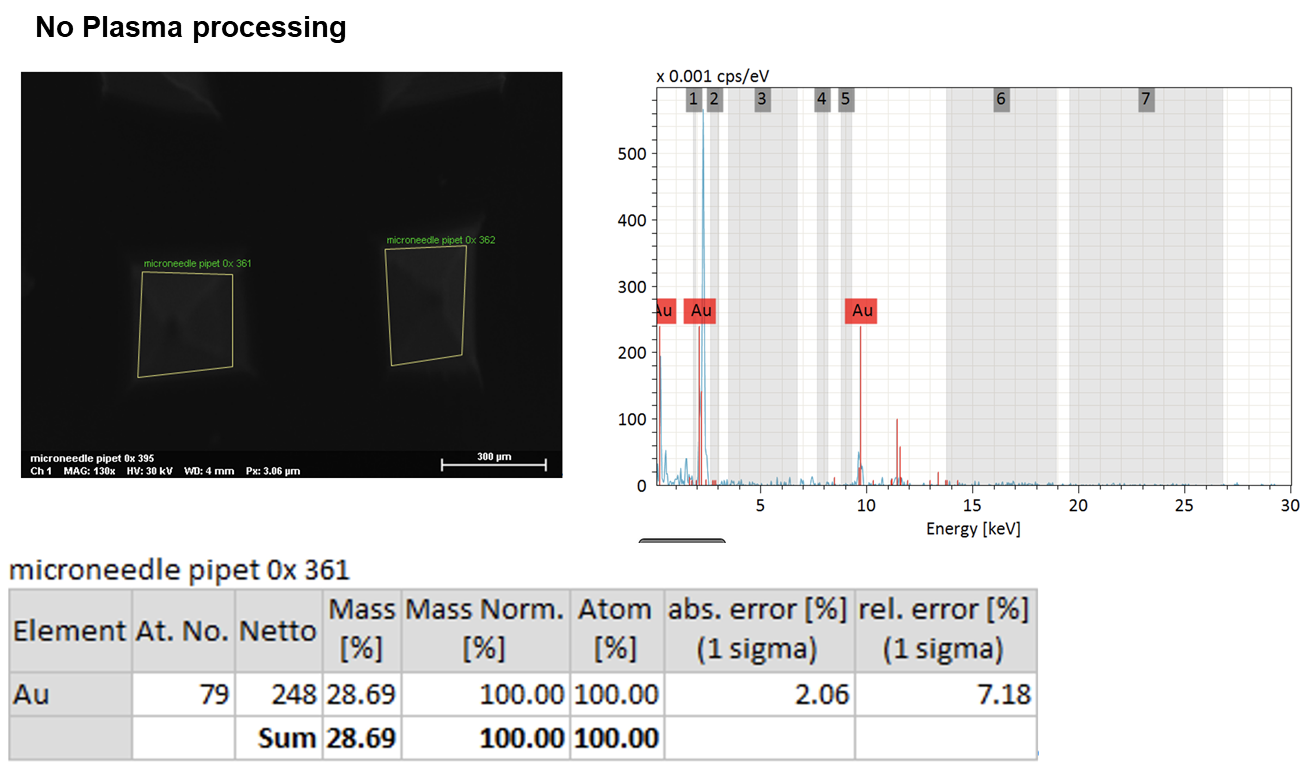
**

(a)

**
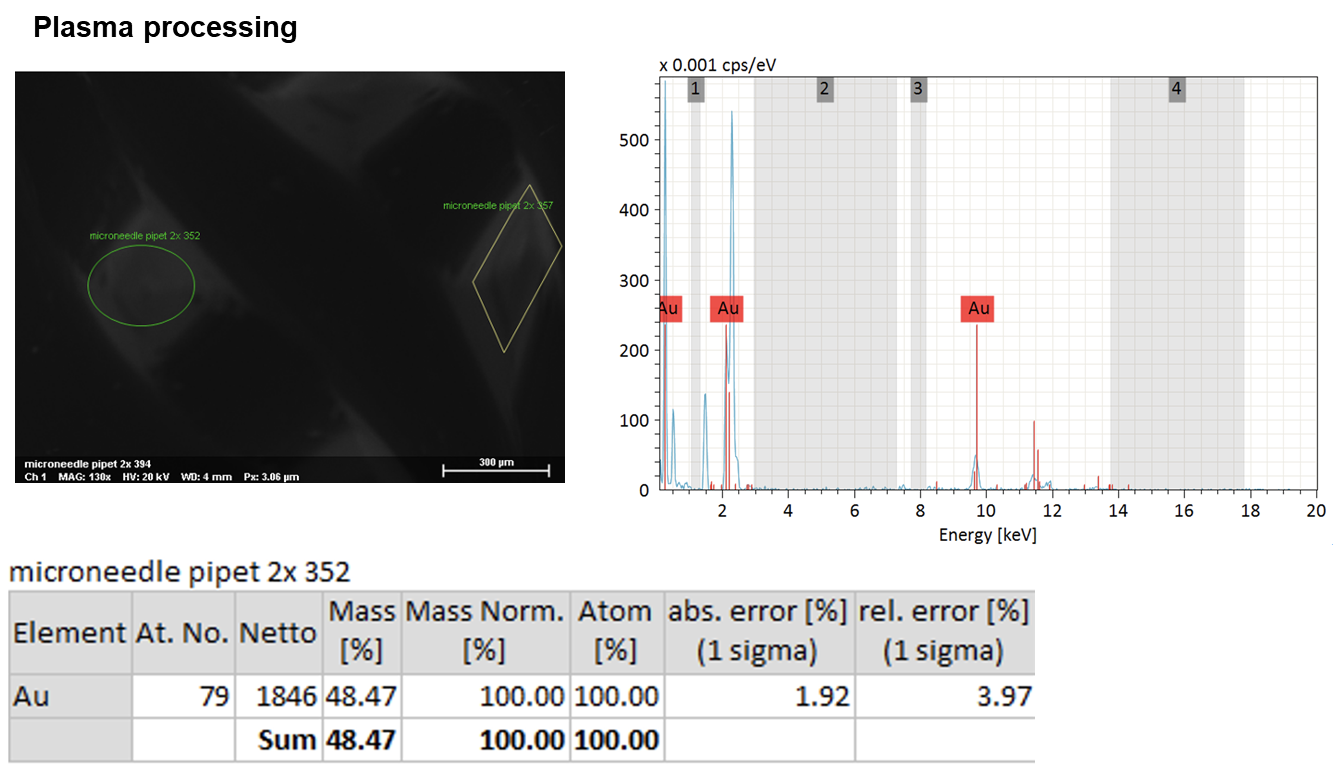
**

(b)

**Figure S3** EDX analysis at tips of microneedle (a) before O2 plasma treatment (b) after O2 plasma treatment

**




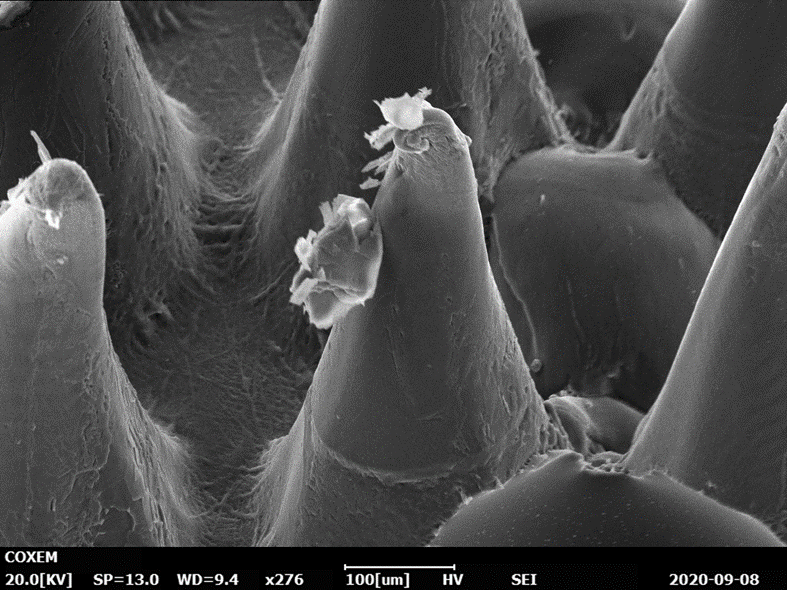

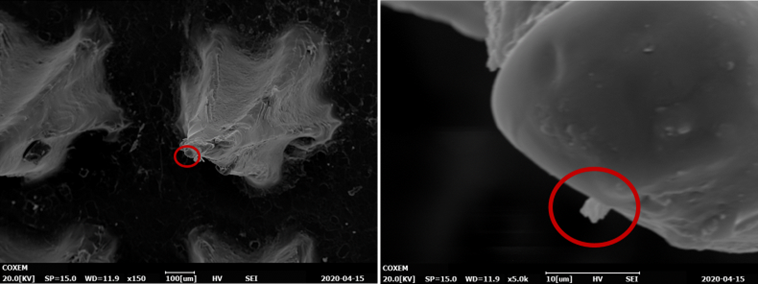
**

**Figure S4.** SEM image of imprinted conical shaped NOA microneedle array
